# Supplementary material for: Glyptothorax (Teleostei: Sisoridae) from the Middle East: An Integrated Molecular and Morphological Insight into Its Taxonomic Diversity
Source: MDPI journal article supplement (doi:10.3390/d14100884), 2022-10-20
Supplement: s1 [file s1]

**Table S1.** Primers used to amplify and their sequences.

| Locus | Primer     | 5'-3' primer sequence       |
|-------|------------|-----------------------------|
| COI   | FishF1     | TCAACCAACCACAAAGACATTGGCAC  |
|       | FishR1     | TAGACTTCTGGGTGGCCAAAG AATCA |
| Cyt b | L14724     | GACTTGAAAAACCACCGTTG        |
|       | H15915     | CTCCGATCTCCG GATTACAAGAC    |
| RAG2  | MHRAG-2-F1 | TGYTATCTCCACCTCTGCGYTACC    |
|       | MHRAG-2-R1 | TCATCCTCCTCATCKTCTCWTGTGA   |

**Table S2.** List of different *Glyptothorax* species from outside the Middle East used in this study.

| Species                          | COI      | Cyt b    | RAG2     | Locality                  | Source  |
|----------------------------------|----------|----------|----------|---------------------------|---------|
| <i>G. aff. zanaensis</i> 1       | HQ593582 | HQ322531 | HQ593556 | China: Yunnan, Longling   | [8]     |
| <i>G. aff. zanaensis</i> 2       | HQ593573 | HQ322509 | HQ593547 | China: Yunnan, Lushui     | [8]     |
| <i>G. aff. zanaensis</i> 3       | HQ593569 | HQ322517 | HQ593543 | China: Yunnan, Baoshan    | [8]     |
| <i>G. burmanicus</i> 1           | HQ593567 | HQ593591 | HQ593541 | China: Yunnan, Longling   | [8]     |
| <i>G. burmanicus</i> 2           | HQ593577 | HQ322551 | HQ593551 | China: Yunnan, Gengma     | [8]     |
| <i>G. cf. lampris</i>            | HQ593587 | HQ593600 | HQ593561 | China: Yunnan, Lancang    | [8]     |
| <i>G. deqinensis</i>             | HQ593564 | HQ593590 | HQ593538 | China: Yunnan, Deqin      | [8]     |
| <i>G. hainanensis</i>            | HQ593584 | HQ593597 | HQ593558 | China: Hainan, Baisha     | [8]     |
| <i>G. honghensis</i>             | HQ593583 | HQ593596 | HQ593557 | China: Yunnan, Xiping     | [8]     |
| <i>G. interspinalum</i>          | HQ593563 | HQ593589 | HQ593537 | China: Yunnan, Lvchun     | [8]     |
| <i>G. laosensis</i>              | HQ593565 | HQ322523 | HQ593539 | China: Yunnan, Mengla     | [8]     |
| <i>G. longicauda</i>             | HQ593578 | HQ593593 | HQ593552 | China: Yunnan, Tengchong  | [8]     |
| <i>G. longjiangensis</i>         | HQ593566 | HQ322520 | HQ593540 | China: Yunnan, Longling   | [8]     |
| <i>G. macromaculatus</i>         | HQ593568 | HQ593592 | HQ593542 | China: Yunnan, Baoshan    | [8]     |
| <i>G. minimaculatus</i>          | HQ593579 | HQ322547 | HQ593553 | China: Yunnan, Tengchong  | [8]     |
| <i>G. ngapang</i>                | HQ593571 | HQ322514 | HQ593545 | China: Yunnan, Gengma     | [8]     |
| <i>G. obliquimaculatus</i>       | HQ593576 | HQ322553 | HQ593550 | China: Yunnan, Gengma     | [8]     |
| <i>G. pallozonum</i>             | HQ593586 | HQ593599 | HQ593560 | China: Guangdong, Haifeng | [8]     |
| <i>G. quadriocellatus</i>        | HQ593562 | HQ593588 | HQ593536 | China: Yunnan, Lvchun     | [8]     |
| <i>G. siamensis</i>              | EU490860 | EU490909 | DQ492335 | Thailand                  | [10]    |
| <i>G. sinensis</i> 1             | HQ593585 | HQ593598 | HQ593559 | China: Guangxi, Longlin   | [8]     |
| <i>G. sinensis</i> 2             | HQ593580 | HQ593594 | HQ593554 | China: Sichuan, Panzhihua | [8]     |
| <i>Glyptothorax</i> sp. Cangyuan | HQ593570 | HQ322516 | HQ593544 | China: Yunnan, Cangyuan   | [8]     |
| <i>Glyptothorax</i> sp. Nujiang  | HQ593575 | HQ322558 | HQ593549 | China: Yunnan, Fugong     | [8]     |
| <i>G. trilineatus</i> 1          | HQ593581 | HQ593595 | HQ593555 | China: Yunnan, Tengchong  | [8]     |
| <i>G. trilineatus</i> 2          | HQ593572 | HQ322512 | HQ593546 | China: Yunnan, Gengma     | [8]     |
| <i>G. zanaensis</i>              | HQ593574 | HQ322507 | HQ593548 | China: Yunnan, Gongshan   | [8]     |
| <i>Bagarius yarrelli</i> †       | KM610423 | AF416897 | DQ192431 | China                     | [11,12] |

† Outgroup.

**Table S3.** GenBank accession numbers (seq. ID / GenBank number) for the new *Glyptothorax* material examined from the Middle East (details of the specimens are given in Table 1)

| Species                  | COI               | Cyt b            | RAG2             |
|--------------------------|-------------------|------------------|------------------|
| <i>G. shapuri</i>        |                   | GY292 / OP589359 |                  |
| <i>G. shapuri</i>        | G396 / OP585111   | P396 / OP589360  | G396R / OP589382 |
| <i>G. shapuri</i>        | G970F / OP585112  |                  |                  |
| <i>G. shapuri</i>        | G971F / OP585113  |                  |                  |
| <i>G. shapuri</i>        | G333 / OP585114   | GY333 / OP589361 |                  |
| <i>G. shapuri</i>        | G401 / OP585115   | G401 / OP589362  | G401R / OP589383 |
| <i>G. silviae</i>        | G395 / OP585116   |                  |                  |
| <i>G. silviae</i>        | G410 / OP585117   |                  |                  |
| <i>G. silviae</i>        |                   | GY330 / OP589363 |                  |
| <i>G. silviae</i>        | G589 / OP585118   | GY295 / OP589364 | G589R / OP589384 |
| <i>G. silviae</i>        | G411 / OP585119   | G411 / OP589365  | G411R / OP589385 |
| <i>G. hosseinpanahii</i> | G597 / OP585120   | GY294 / OP589366 | G597R / OP589386 |
| <i>G. hosseinpanahii</i> | G598 / OP585121   | GY332 / OP589367 | G598R / OP589387 |
| <i>G. alidaei</i>        | Ex58F4 / OP585122 |                  |                  |
| <i>G. alidaei</i>        | G606 / OP585123   |                  |                  |
| <i>G. alidaei</i>        | Ex58F3 / OP585124 |                  |                  |
| <i>G. alidaei</i>        | G414 / OP585125   | G414 / OP589368  | G414R / OP589388 |
| <i>G. alidaei</i>        |                   | GY326 / OP589369 |                  |
| <i>G. alidaei</i>        |                   | GY329 / OP589370 |                  |
| <i>G. alidaei</i>        | G728F / OP585126  | G728b / OP589371 | G835R / OP589389 |
| <i>G. alidaei</i>        | G726F / OP585127  |                  |                  |
| <i>G. alidaei</i>        | G729F / OP585128  |                  |                  |
| <i>G. alidaei</i>        | G727F / OP585129  |                  |                  |
| <i>G. cf. galaxias</i>   | G323 / OP585130   | GY323 / OP589372 | G323R / OP589390 |
| <i>G. cf. galaxias</i>   | G558 / OP585131   | G558b / OP589373 | G558R / OP589391 |
| <i>G. cf. galaxias</i>   |                   | G557b / OP589374 | G557R / OP589392 |
| <i>G. cf. galaxias</i>   | G296 / OP585132   | GY296 / OP589375 | G296R / OP589393 |
| <i>G. galaxias</i>       |                   | GY327 / OP589376 |                  |
| <i>G. galaxias</i>       |                   | GY325 / OP589377 | G331R / OP589394 |
| <i>G. armeniacus</i>     | G834 / OP585133   |                  |                  |
| <i>G. armeniacus</i>     | G369 / OP585134   |                  |                  |
| <i>G. daemon</i> 1       | G931F / OP585135  |                  |                  |
| <i>G. daemon</i> 1       | G559 / OP585136   |                  |                  |
| <i>G. cous</i>           | G324 / OP585137   | GY324 / OP589378 | G324R / OP589395 |
| <i>G. cous</i>           | G368 / OP585138   | G368 / OP589379  | G368R / OP589396 |
| <i>G. kurdistanicus</i>  | G510 / OP585139   | G510b / OP589380 | G510R / OP589397 |
| <i>G. pallens</i>        |                   | G511b / OP589381 | G511R / OP589398 |

**Table S4.** Results of the Xia's nucleotide substitution saturation test for COI, *Cyt b* and RAG2 of the studied *Glyptothorax* specimens

| Locus        | C.P.      | <i>I</i> <sub>ss</sub> | <i>I</i> <sub>ss.cS</sub> | T      | DF  | P.S    | <i>I</i> <sub>ss.cA</sub> | T      | DF  | P.A    |
|--------------|-----------|------------------------|---------------------------|--------|-----|--------|---------------------------|--------|-----|--------|
| COI          | 1st + 2nd | 0.054                  | 0.695                     | 17.511 | 39  | 0.0001 | 0.367                     | 8.551  | 39  | 0.0001 |
|              | 3rd       | 0.085                  | 0.687                     | 33.228 | 216 | 0.0001 | 0.368                     | 15.612 | 216 | 0.0001 |
| <i>Cyt b</i> | 1st + 2nd | 0.079                  | 0.742                     | 17.707 | 43  | 0.0001 | 0.483                     | 10.793 | 43  | 0.0001 |
|              | 3rd       | 0.085                  | 0.669                     | 40.035 | 328 | 0.0001 | 0.415                     | 22.646 | 328 | 0.0001 |
| RAG2         | 1st + 2nd | 0.003                  | 0.729                     | 261.87 | 593 | 0.0001 | 0.512                     | 183.53 | 593 | 0.0001 |
|              | 3rd       | 0.012                  | 0.666                     | 95.840 | 296 | 0.0001 | 0.455                     | 64.907 | 296 | 0.0001 |

C.P. = codon position; N.OTU = number of operational taxonomic units; *I*<sub>ss</sub> = index of substitution saturation; *I*<sub>ss.cS</sub> = critical value for symmetrical tree topology; T = T-value; DF = degrees of freedom; P.S and P.A. = probability that *I*<sub>ss</sub> is significantly different from the critical value (*I*<sub>ss.cS</sub> or *I*<sub>ss.cA</sub>, respectively); *I*<sub>ss.cA</sub> = critical value for extremely asymmetrical tree topology.
